# Supplementary material for: Application of Ferrocene in the Treatment of Winery Wastewater in a Heterogeneous Photo-Fenton Process
Source: MDPI journal article supplement (doi:10.3390/materproc2022009012), 2022-04-24

IOCN  
2022

# The 3rd International Online-Conference on Nanomaterials

25 APRIL – 10 MAY 2022 | ONLINE

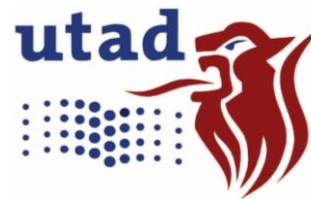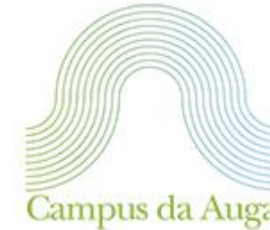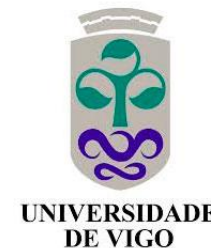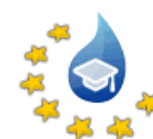

AOPs PhD School

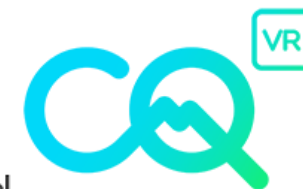

CENTRO  
DE QUÍMICA  
VILA REAL

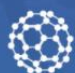

nanomaterials

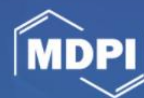

## Application of ferrocene for the treatment of winery wastewater in a heterogeneous photo-Fenton process

Nuno Jorge<sup>1,2</sup> \*; Ana R. Teixeira<sup>2</sup>; Leonilde Marchão<sup>2</sup>; Pedro B. Tavares<sup>2</sup>; Marco S. Lucas<sup>2</sup>; José A. Peres<sup>2</sup>

<sup>1</sup> Escuela Internacional de Doctorado (EIDO), Campus da Auga, Campus Universitario de Ourense, Universidade de Vigo, As Lagoas, 32004, Ourense, Spain

<sup>2</sup> Centro de Química de Vila Real (CQVR), Departamento de Química, Universidade de Trás-os-Montes e Alto Douro (UTAD), Quinta de Prados, 5001-801, Vila Real, Portugal

\* njorge@uvigo.es

**3rd International Online-Conference on Nanomaterials**

**Nanotechnology for Catalysis, Electrochemistry, Energy, and Environment (Session G)**

25 April – 10 May 2022

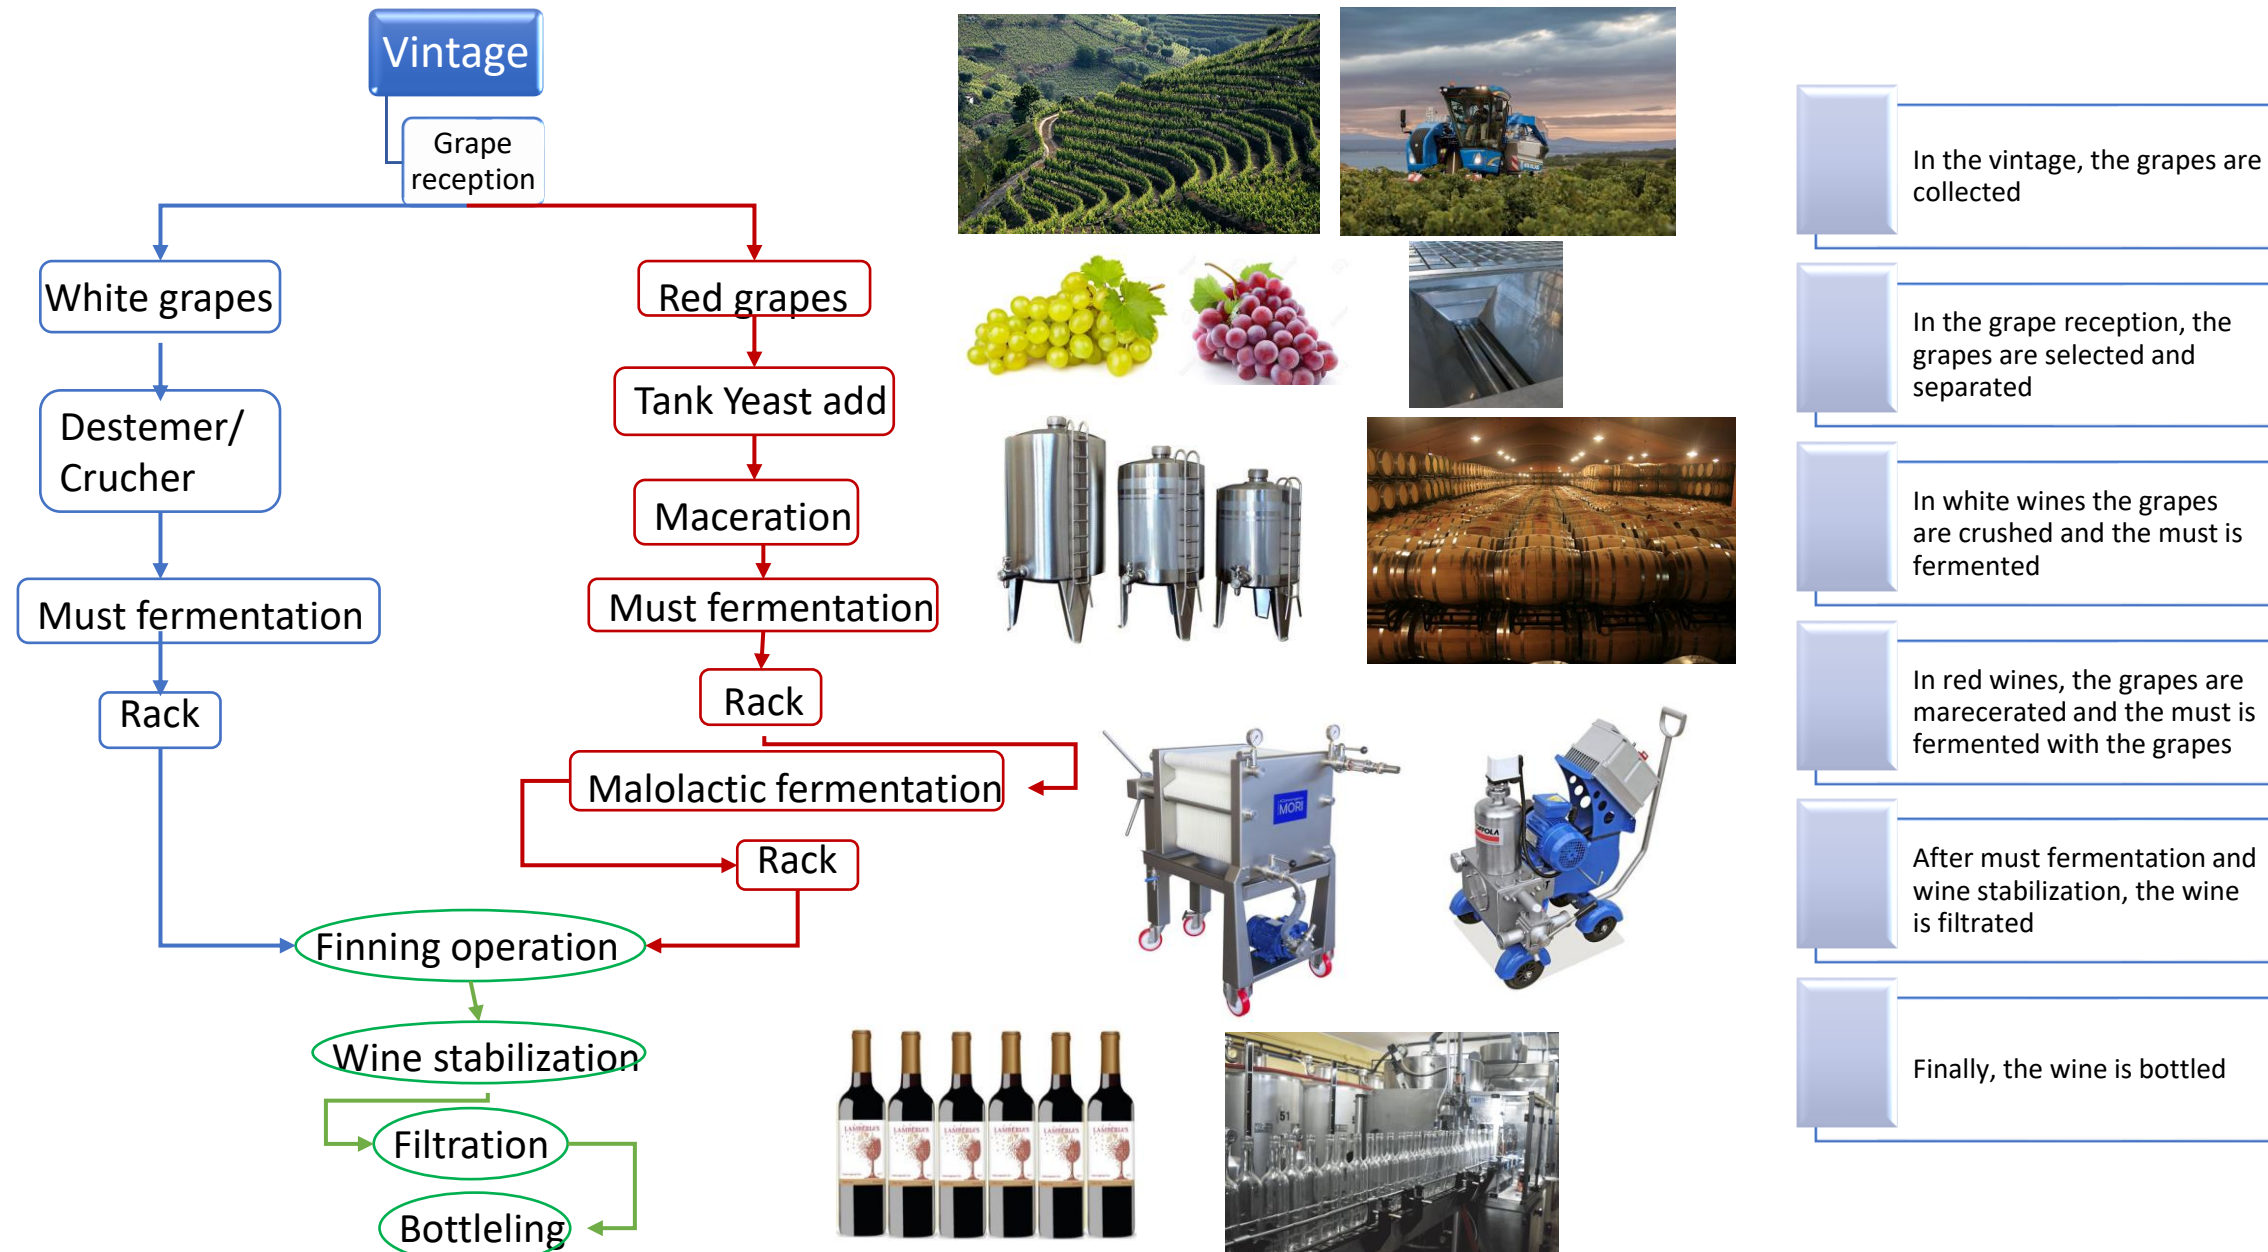

In the vintage, the grapes are collected

In the grape reception, the grapes are selected and separated

In white wines the grapes are crushed and the must is fermented

In red wines, the grapes are macerated and the must is fermented with the grapes

After must fermentation and wine stabilization, the wine is filtrated

Finally, the wine is bottled

# Winery wastewater main characteristics

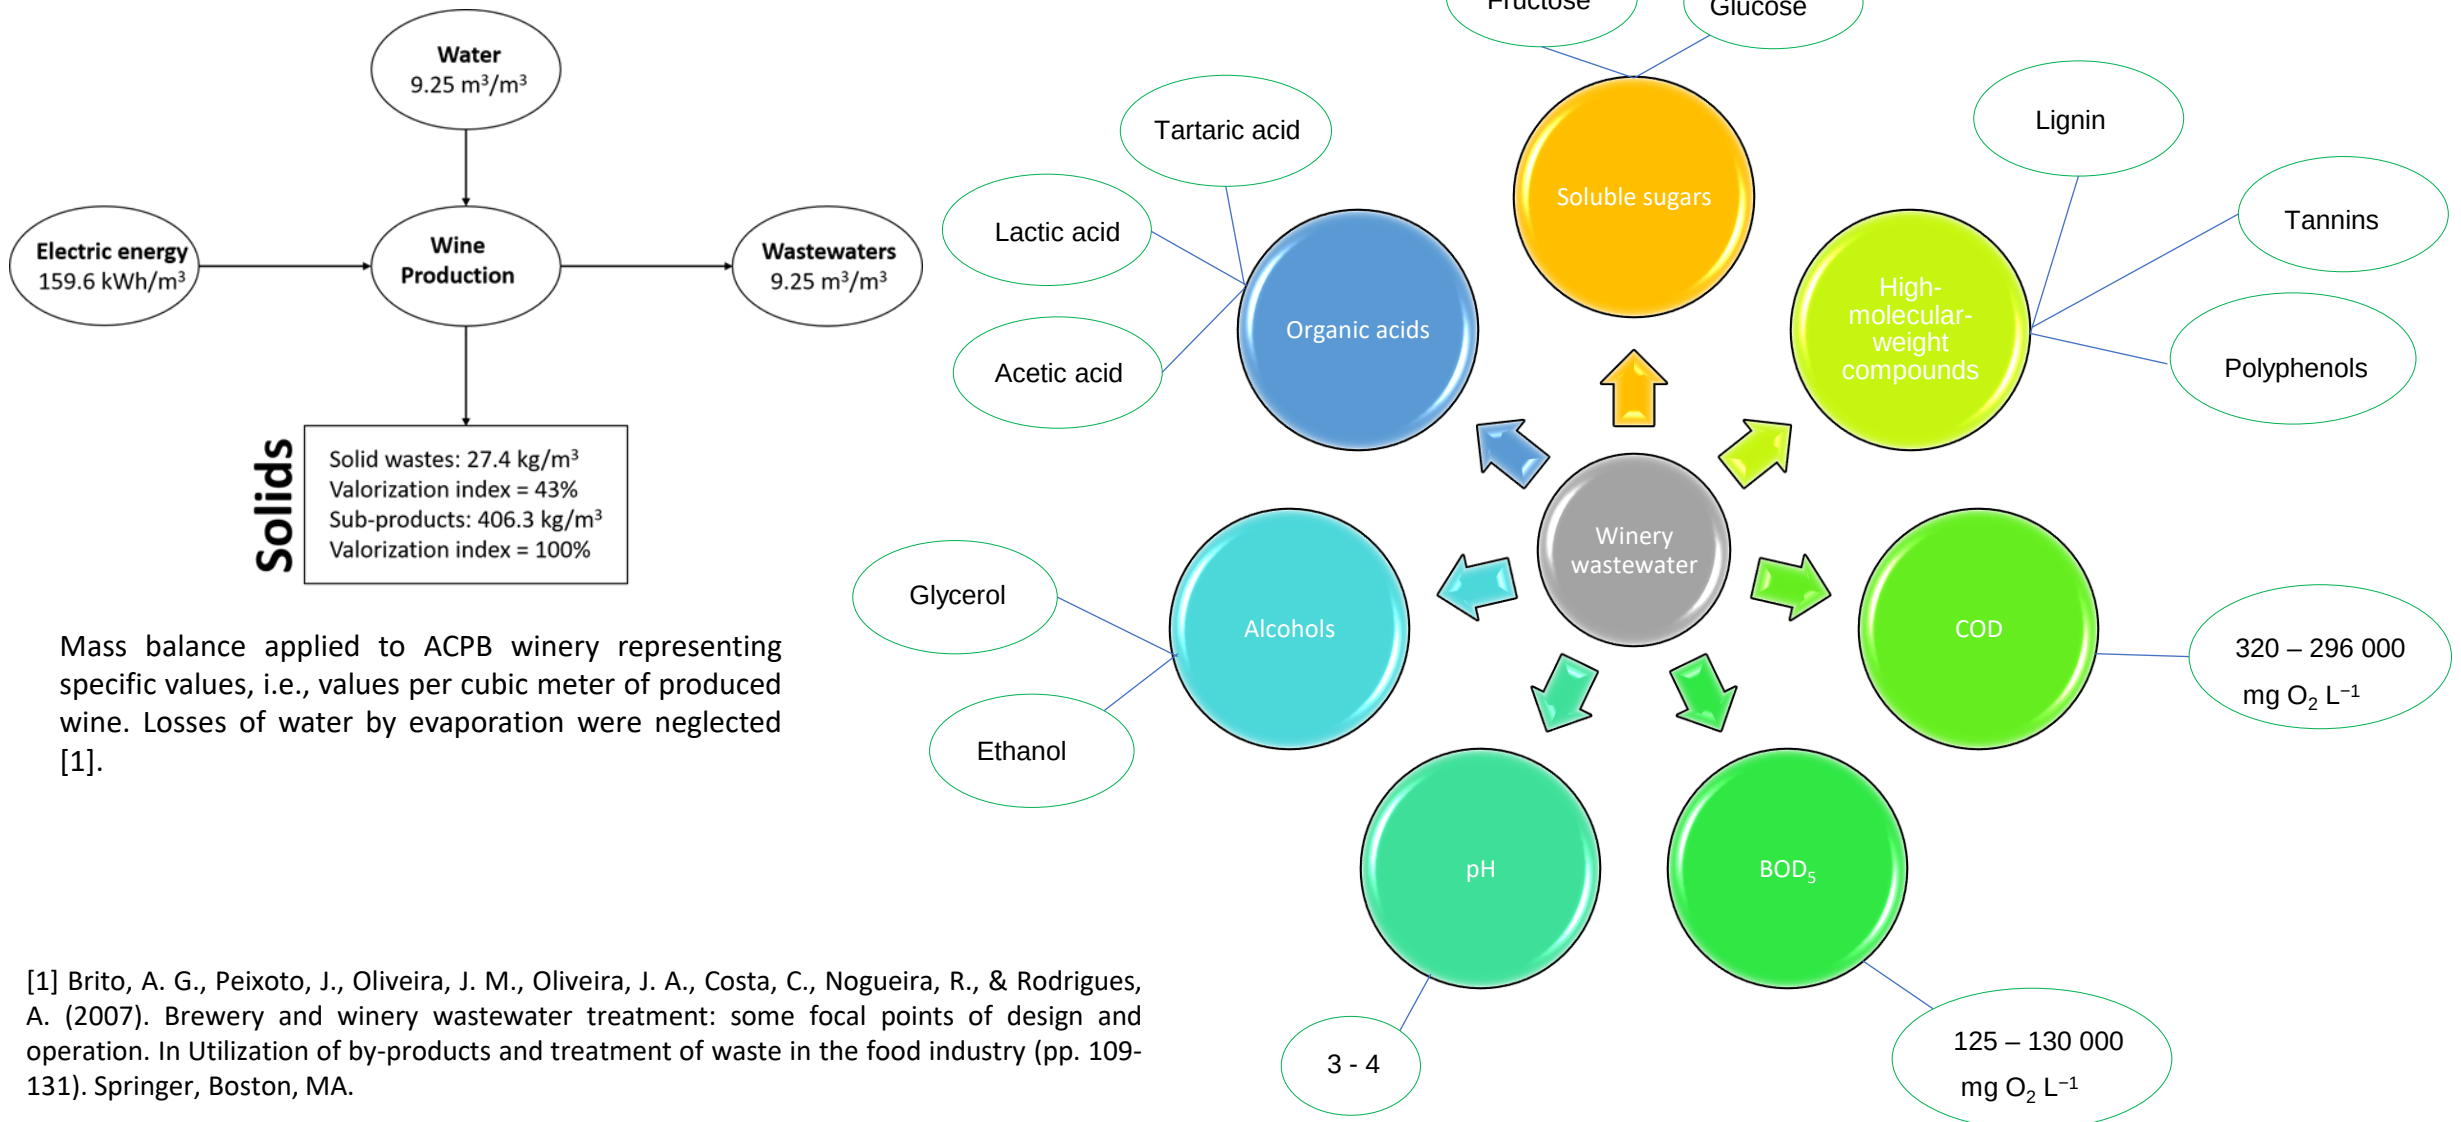

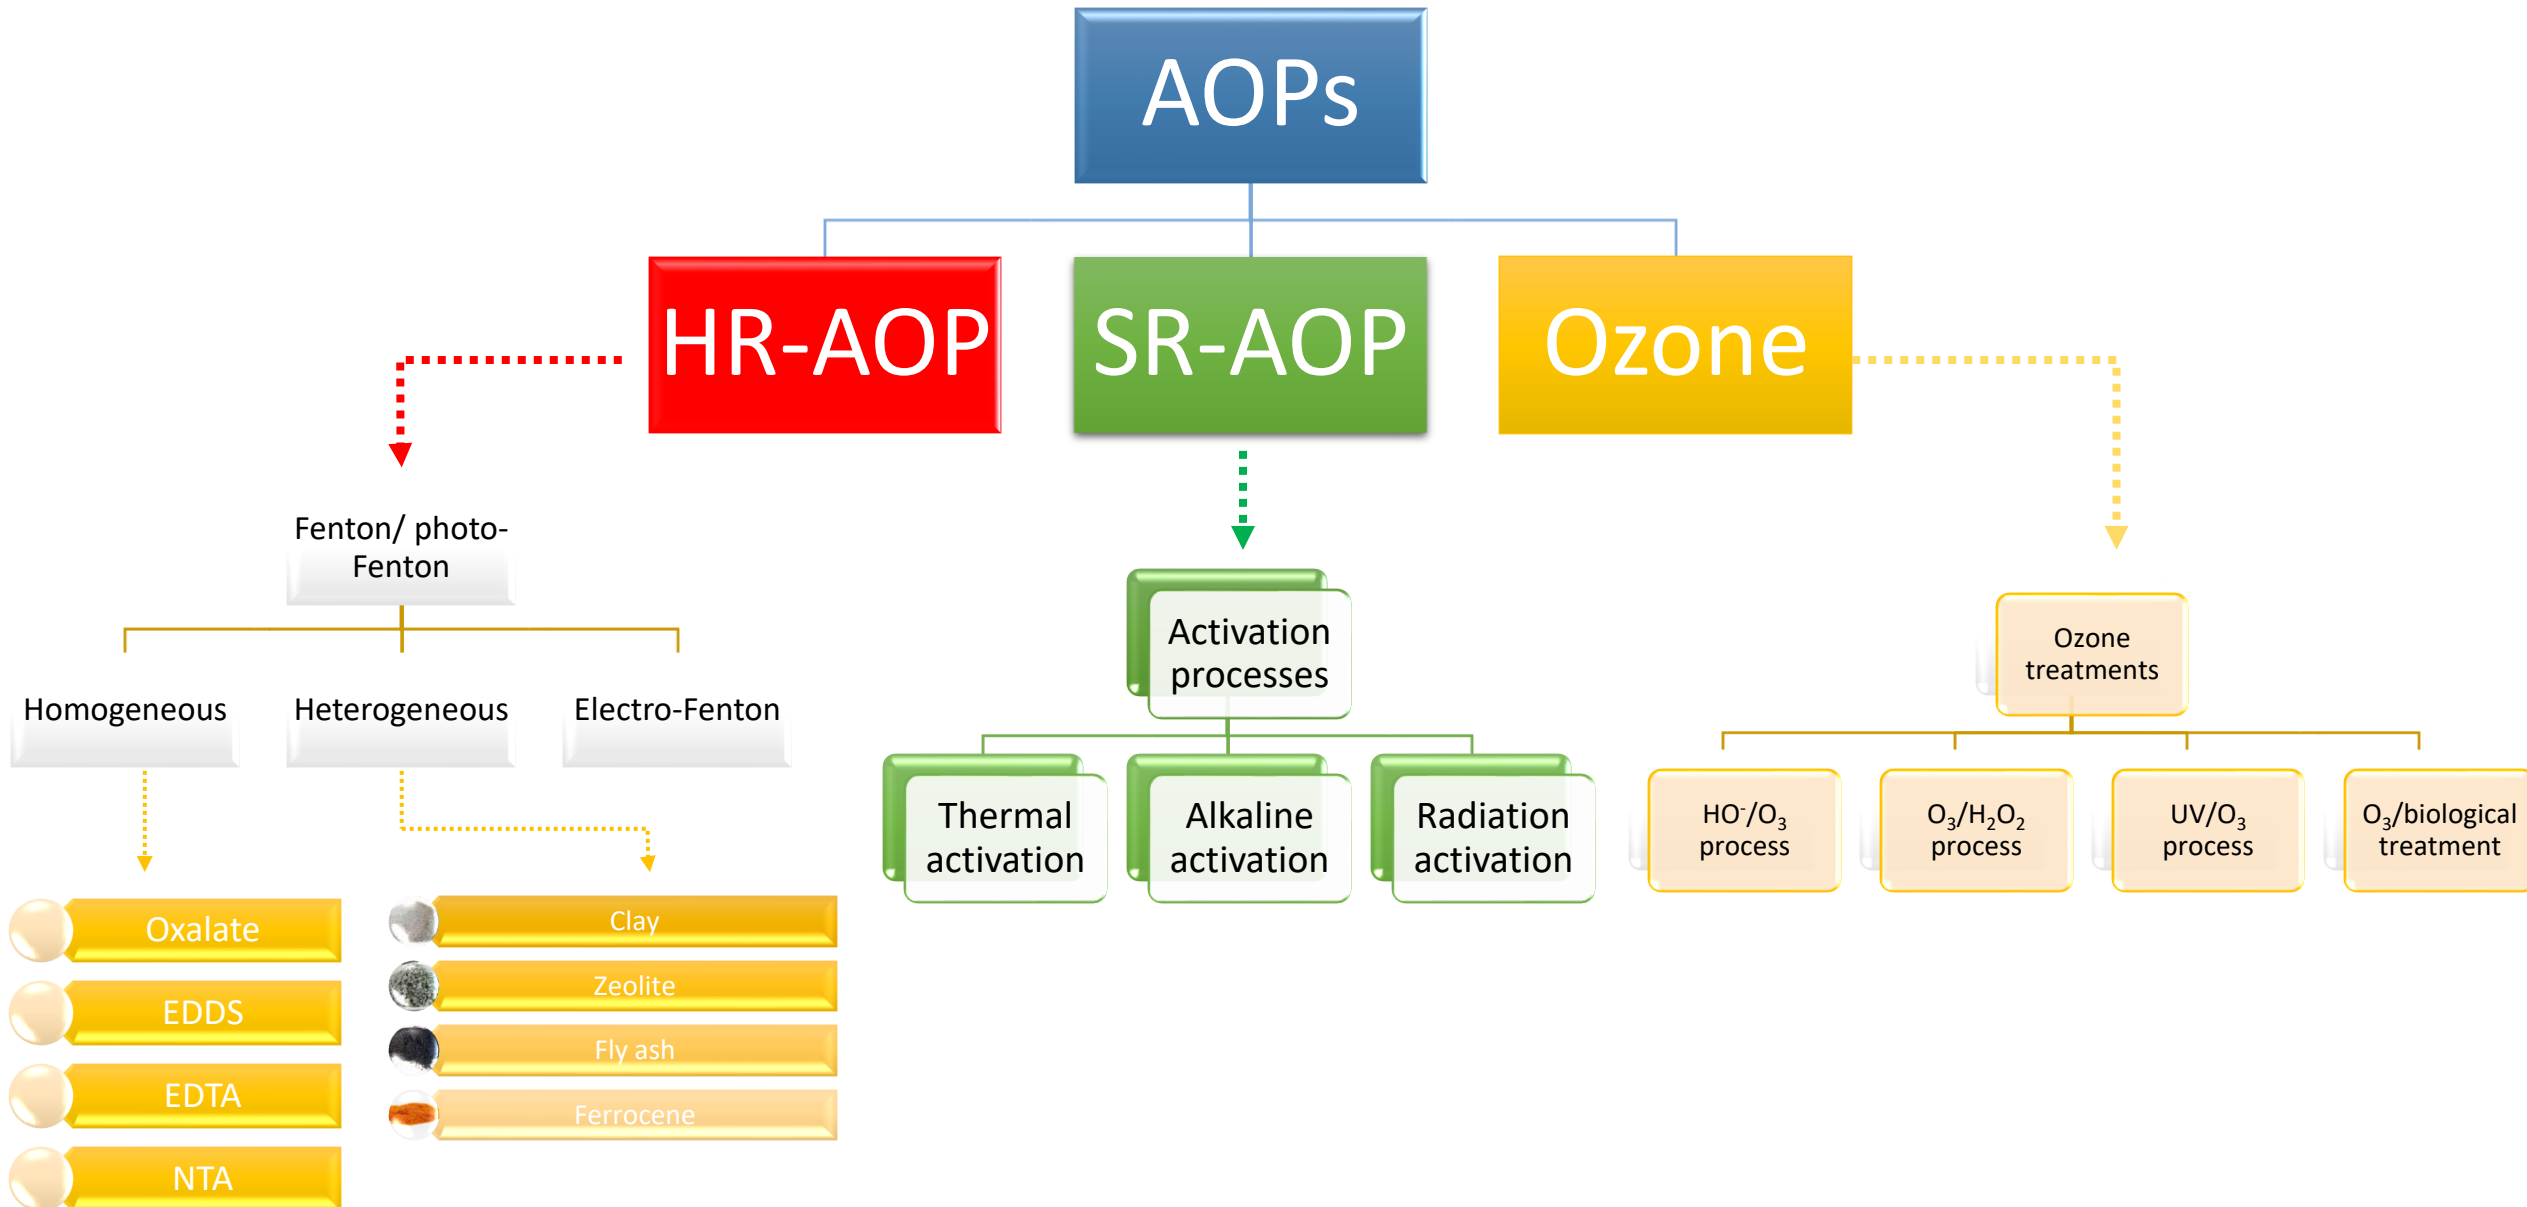

# Introduction

## Objectives

## Material and methods

## Results and discussion

## Conclusions

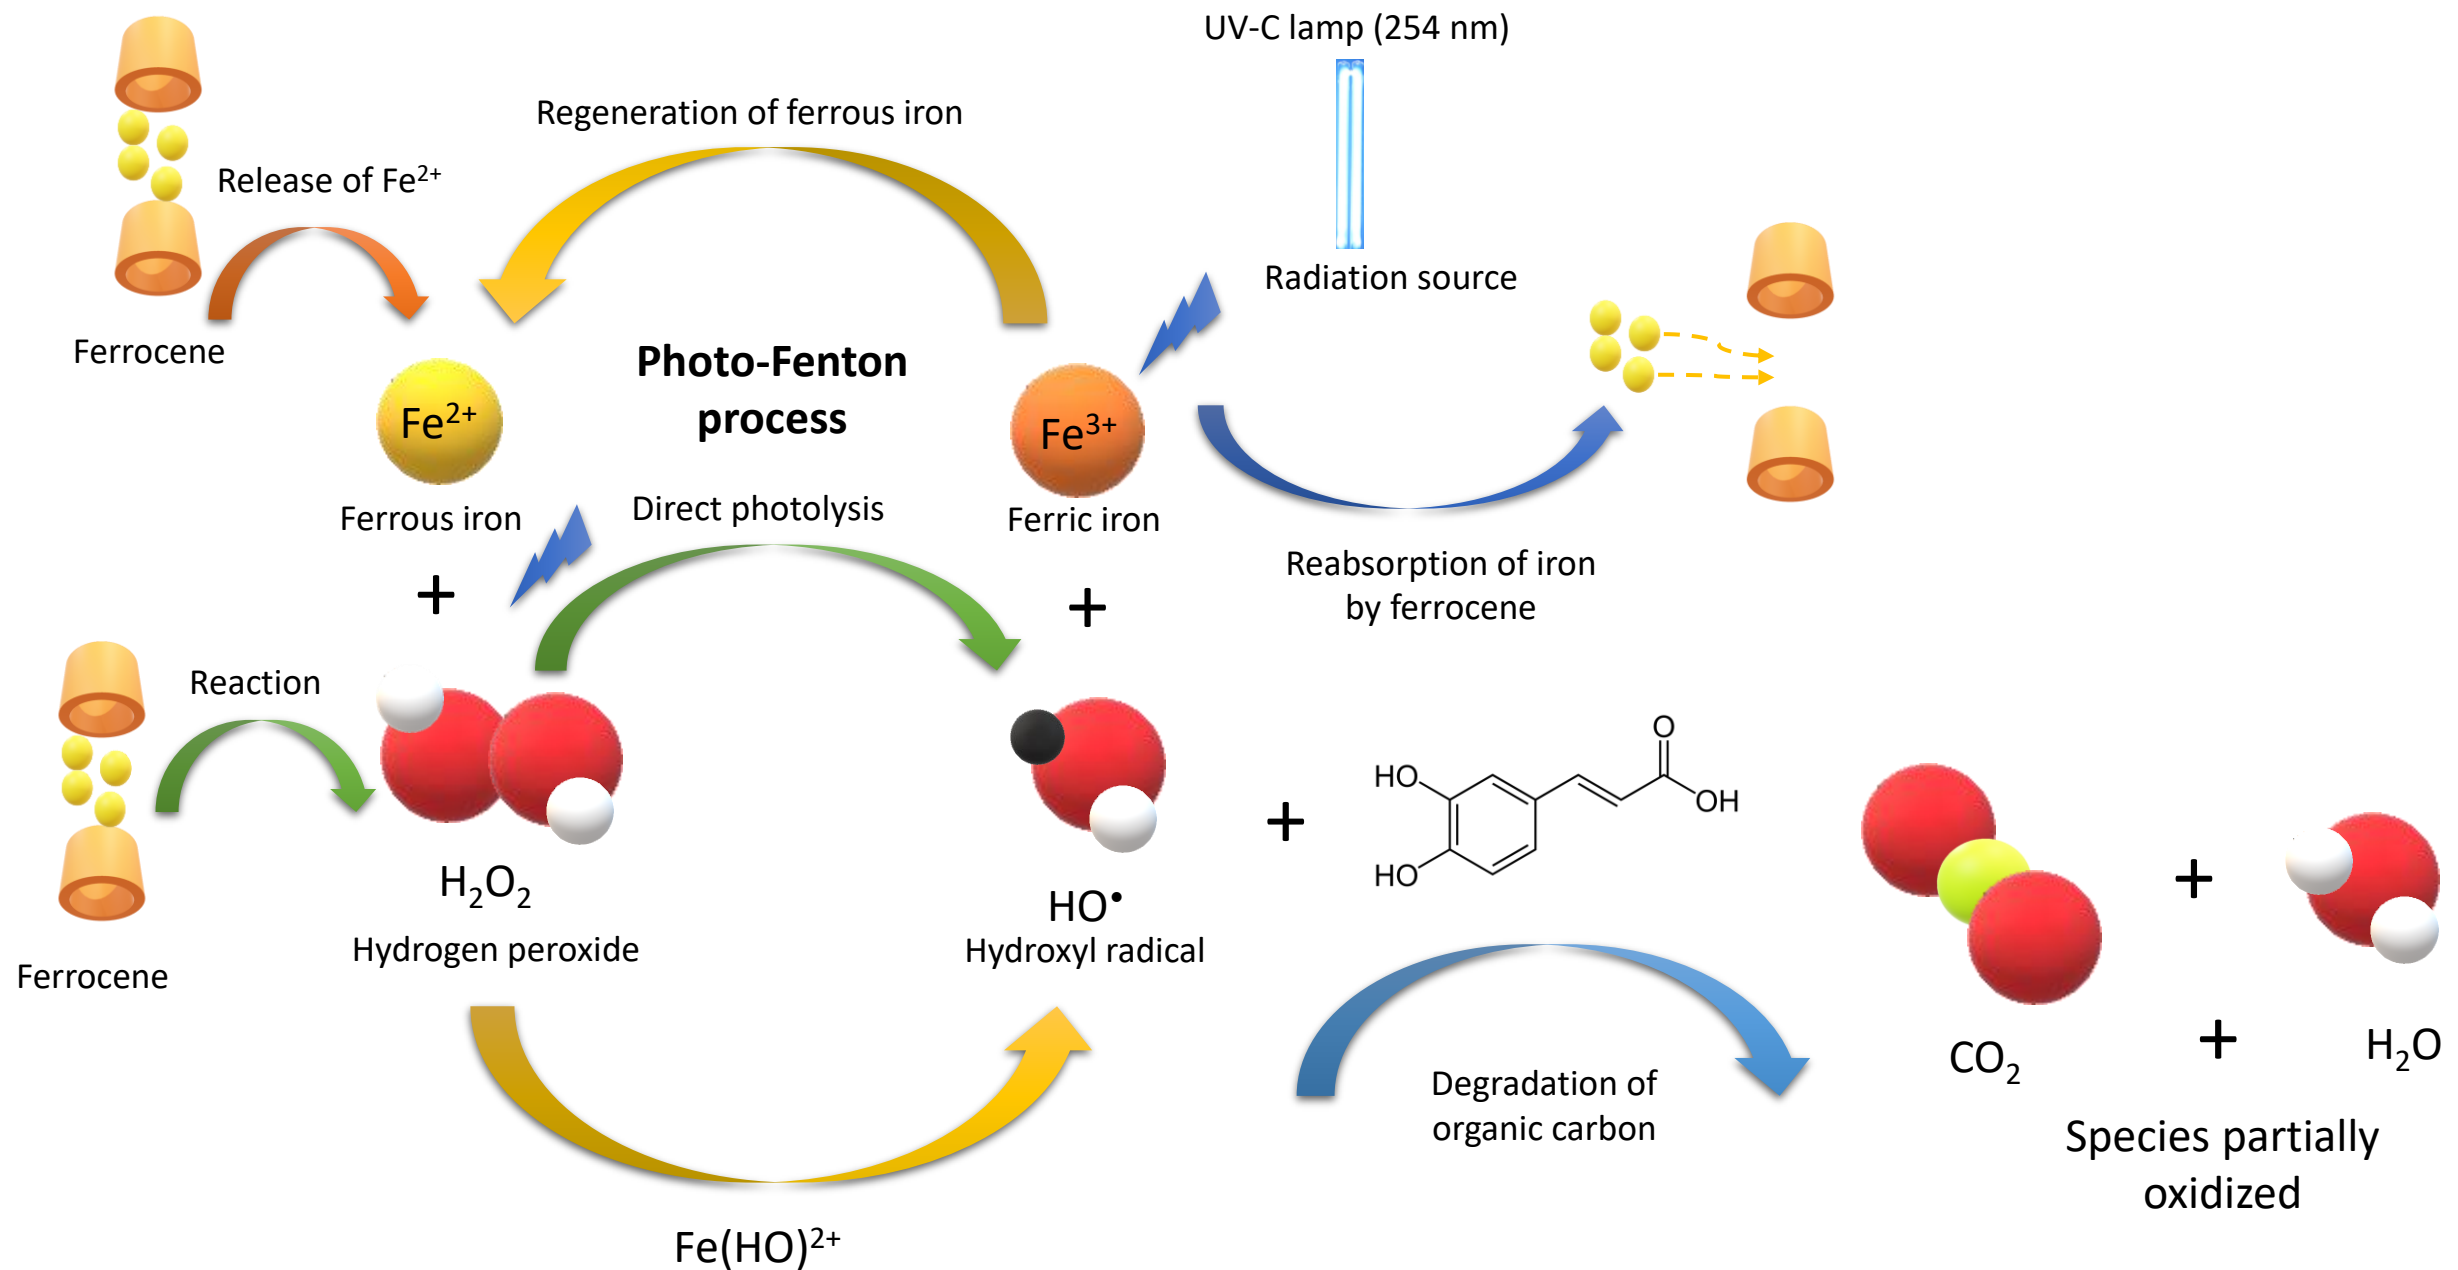

Considering the low information regarding the treatment of winery wastewater by heterogeneous photo-Fenton, catalyzed by ferrocene, the aim of this work is:

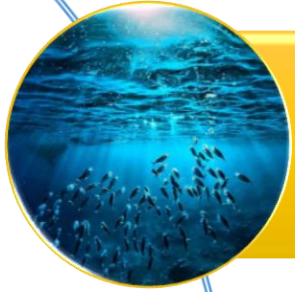

(1) To characterize ferrocene by FTIR and SEM

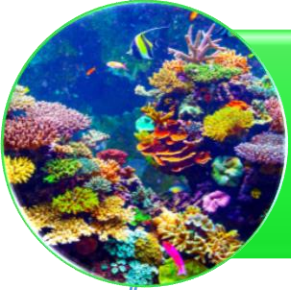

(2) to optimize heterogenous photo-Fenton

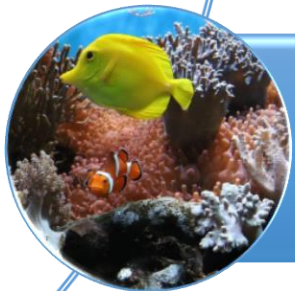

(3) to study the kinetic rate and regeneration of ferrocene

## Winery wastewater collection and storage

### Winery wastewater characterization

Main chemical characteristics of winery wastewater (WW)

| Parameters                                                          | Portuguese Law<br>Decree nº<br>236/98 | WW   |
|---------------------------------------------------------------------|---------------------------------------|------|
| pH                                                                  | 6.0-9.0                               | 4.0  |
| Biochemical Oxygen Demand - BOD <sub>5</sub> (mg O <sub>2</sub> /L) | 40                                    | 550  |
| Chemical Oxygen Demand - COD (mg O <sub>2</sub> /L)                 | 150                                   | 2145 |
| Biodegradability – BOD <sub>5</sub> /COD                            |                                       | 0.26 |
| Total Organic Carbon – TOC (mg C/L)                                 |                                       | 400  |
| Turbidity (NTU)                                                     |                                       | 296  |
| Total suspended solids – TSS (mg/L)                                 | 60                                    | 750  |
| Electrical conductivity (µS/cm)                                     |                                       | 62.5 |
| Total polyphenols (mg gallic acid/L)                                | 0.5                                   | 22.6 |
| Iron (mg/L)                                                         | 2.0                                   | 0.05 |

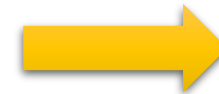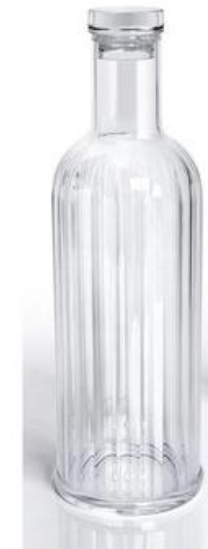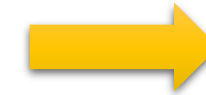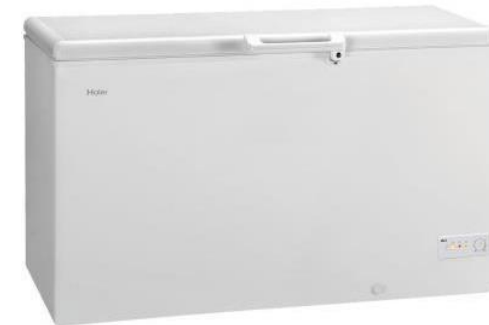

Storage in  
small  
containers

Conservation at -40°C

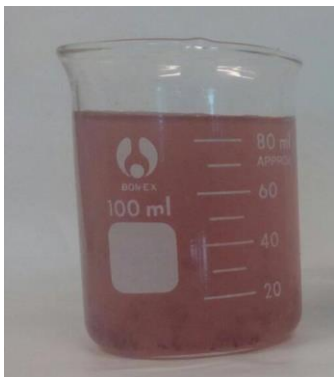

Winery wastewater used in this  
work

## Equipment used in the heterogeneous photo-Fenton process

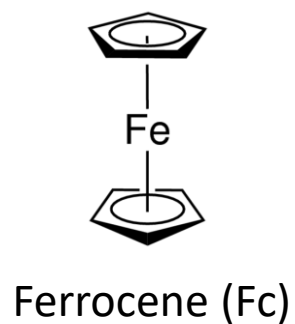

+

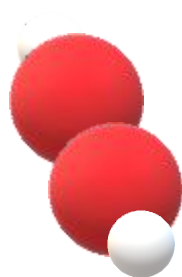 $\text{H}_2\text{O}_2$ 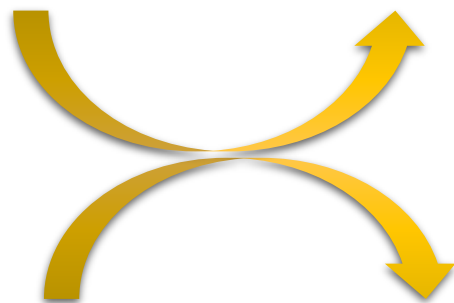

Power generator

Sample retriever

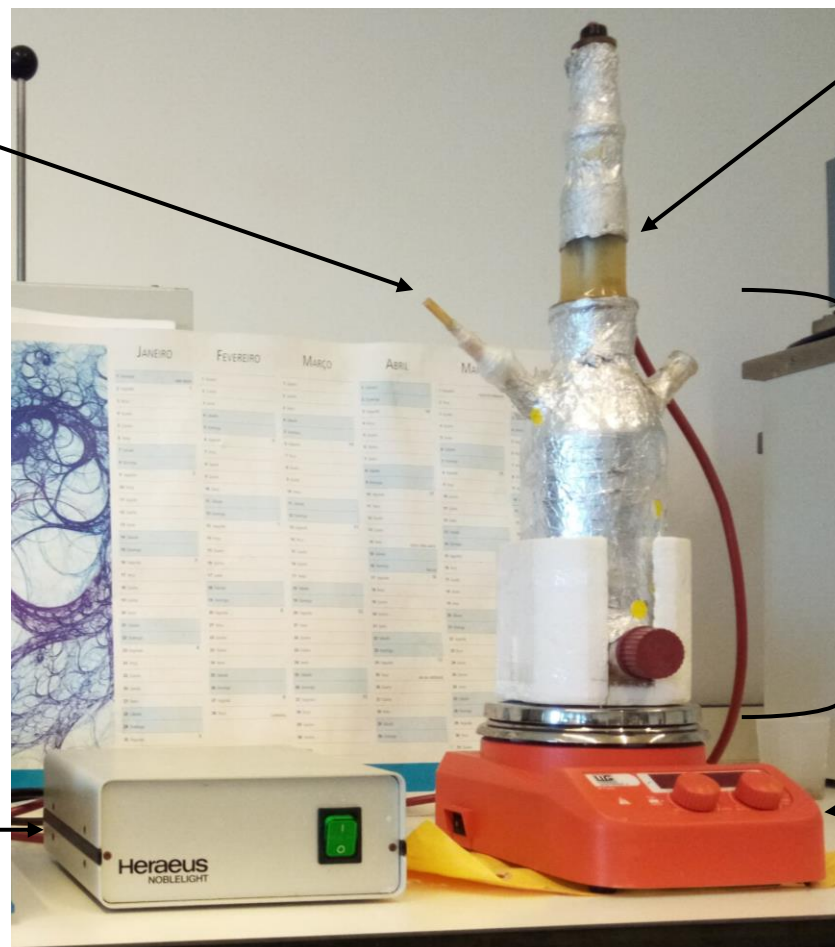UV-C Mercury lamp  
 $\lambda = 254 \text{ nm}$ Cylindrical  
photoreactor  
 $V = 500 \text{ mL}$ 

Stirrer

## Characterization of Ferrocene

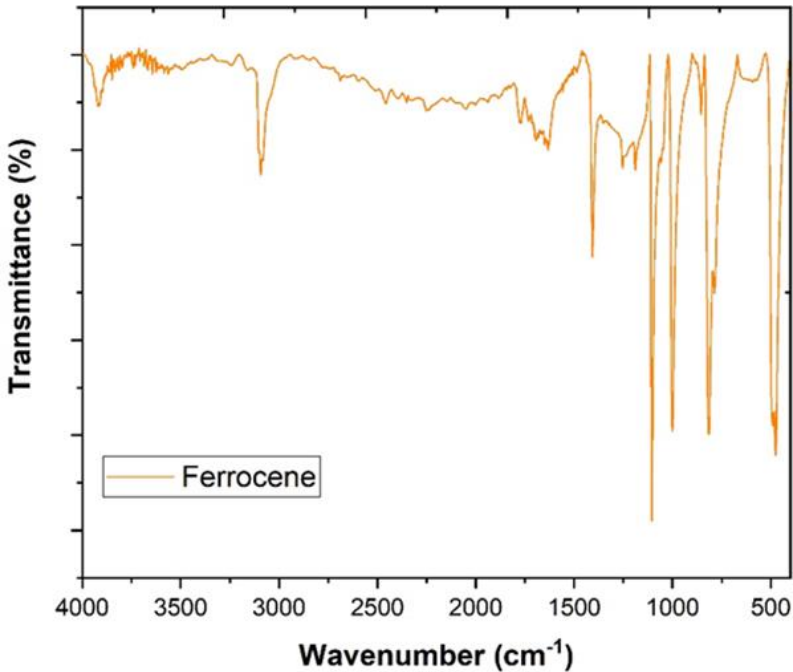

FTIR spectra of ferrocene.

C-H stretching at  $3093 \text{ cm}^{-1}$

C=C stretching at  $1631 \text{ cm}^{-1}$

Fe peak at  $476 \text{ cm}^{-1}$

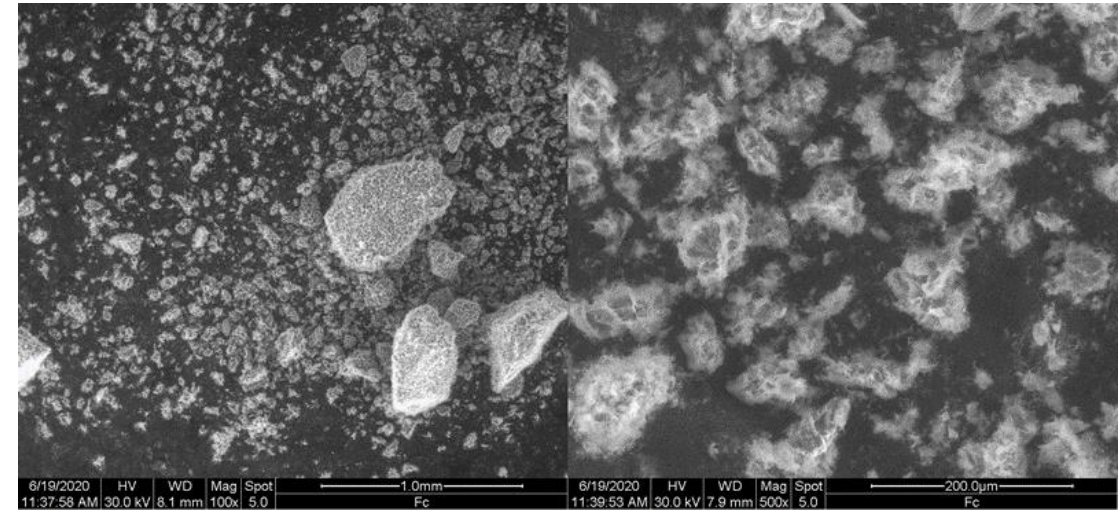

Scanning Electron Microscopy (SEM) images of ferrocene (100 and 500x).

The ferrocene catalyst in its initial form has an irregular shape

The ferrocene has a lot of free space in between the particles

The ferrocene has adsorption capacity

## Heterogeneous photo-Fenton optimization

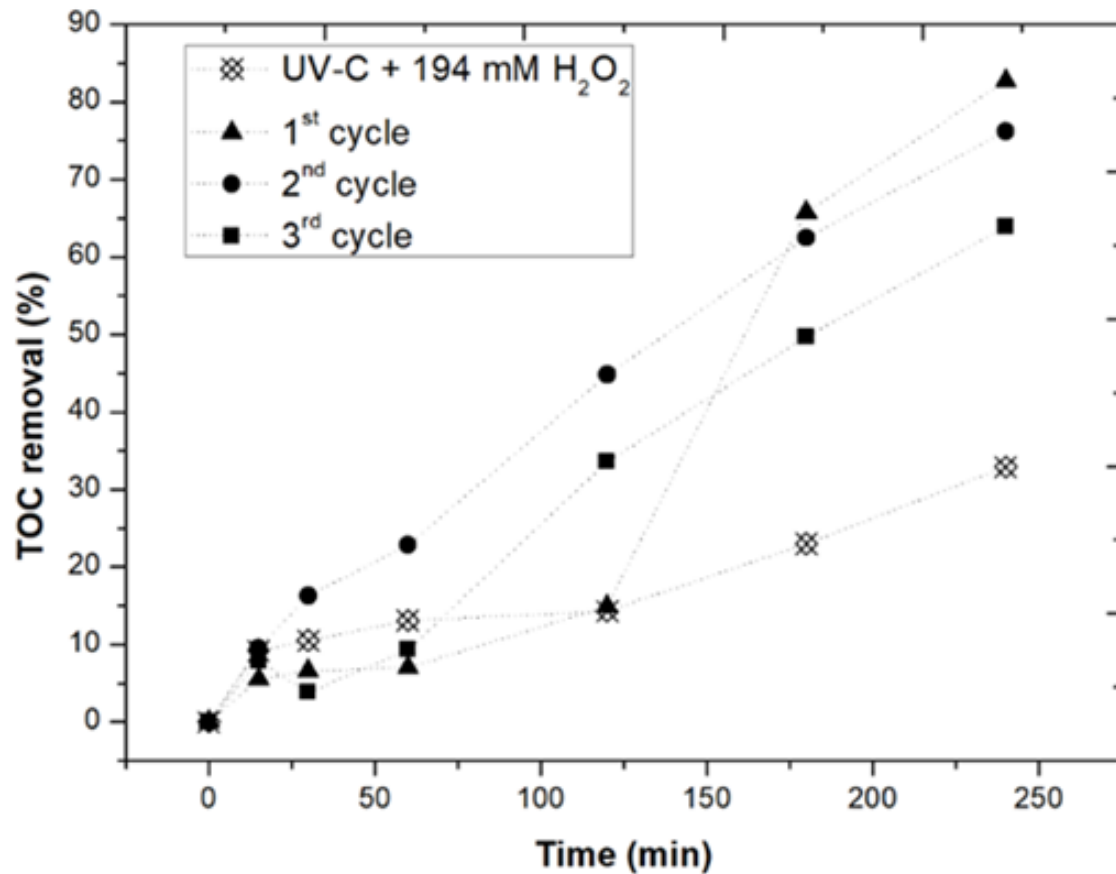

Regeneration cycles from ferrocene catalyst along the 3 consecutive cycles of the heterogeneous photo-Fenton process ([Fc] = 0.50 g/L, [H<sub>2</sub>O<sub>2</sub>] = 194 mM, pH = 3.0, agitation = 350 rpm, T = 298 K, radiation UV-C, t = 240 min).

- The pH was varied from 3.0 to 7.0, and results showed that heterogeneous photo-Fenton process was highly dependent on pH (3.0 > 4.0 > 6.0 > 7.0) with 53.3, 42.1, 35.0 and 22.8% respectively

- The H<sub>2</sub>O<sub>2</sub> concentration was varied from 97 to 291 mM, and results showed a TOC re-moval of 48.5, 82.7 and 81.4%, respectively, for 97, 194 and 291 mM H<sub>2</sub>O<sub>2</sub>

- The ferrocene catalyst concentration was varied (0.25 to 1.0 g/L) and results showed a TOC removal of 83.1, 82.7 and 54.2%, respectively, for 0.25, 0.50 and 1.0 g/L Fc

- The durability of the Fc catalyst was examined by recovering the material and re-using it under the best operational conditions, as follows: [Fc] = 0.50 g/L, [H<sub>2</sub>O<sub>2</sub>] = 194 mM, pH = 3.0, agitation = 350 rpm, T = 298 K, radiation UV-C, t = 240 min, for 3 consecutive cycles
- The results showed a TOC removal of 82.7, 76.2 and 63.9%, respectively for the 1st, 2nd and 3rd cycles, therefore, the FC catalyst can be reused

## Kinetic analysis

The Fermi's non-linear kinetic model was used to determine the behavior of the ferrocene catalyst.

$$\frac{\text{TOC}}{\text{TOC}_0} = \frac{1 - X_{\text{TOC}}}{1 + \exp[k_{\text{TOC}}(t - t_{\text{TOC}}^*)]} + X_{\text{TOC}}$$

- where  $k_{\text{TOC}}$  corresponds to the apparent reaction rate constant;  $t_{\text{TOC}}^*$  represents the transition time related to the TOC content curve's inflection point, and  $x_{\text{TOC}}$  corresponds to the fraction of non-oxidizable compounds that are formed during the reaction;
- The results showed that a higher  $k_{\text{TOC}}$  was obtained under the operational conditions pH 3.0, Fc dosage 0.50 g/L,  $\text{H}_2\text{O}_2$  concentration 194 mM (addition in six steps) ( $k_{\text{TOC}} = 4.770 \times 10^{-2} \text{ min}^{-1}$ ; 82.7% TOC removal).

Based in the results, it is concluded

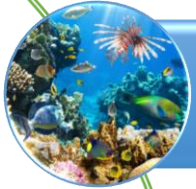

(1) The ferrocene can be used as source of iron in heterogeneous catalysis in winery wastewater treatment

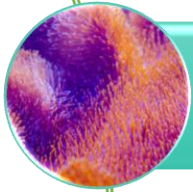

(2) Under the optimal conditions, the heterogeneous photo-Fenton achieves a 82.7% TOC removal

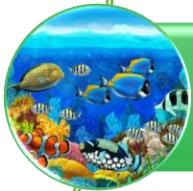

(3) Fermi's kinetic model shows that under the best operational condition a  $k_{\text{TOC}} = 4.770 \times 10^{-2} \text{ min}^{-1}$

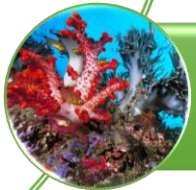

(4) Ferrocene can be reused for three consecutive cycles, with a TOC removal of 82.7, 76.2 and 63.9%, respectively, for the 1<sup>st</sup>, 2<sup>nd</sup> and 3<sup>rd</sup> cycles

# Acknowledgements

The authors thank the North Regional Operational Program (NORTE 2020) and the European Regional Development Fund (ERDF), and express their appreciation for the financial support of the Project AgriFood XXI, operation nº NORTE-01-0145-FEDER-000041 and also to the Fundação para a Ciência e a Tecnologia (FCT) for the financial support provided to CQVR through UIDB/00616/2020. Ana R. Teixeira also thanks the FCT for the financial support provided through the PhD grant UI/BD/150847/2020.

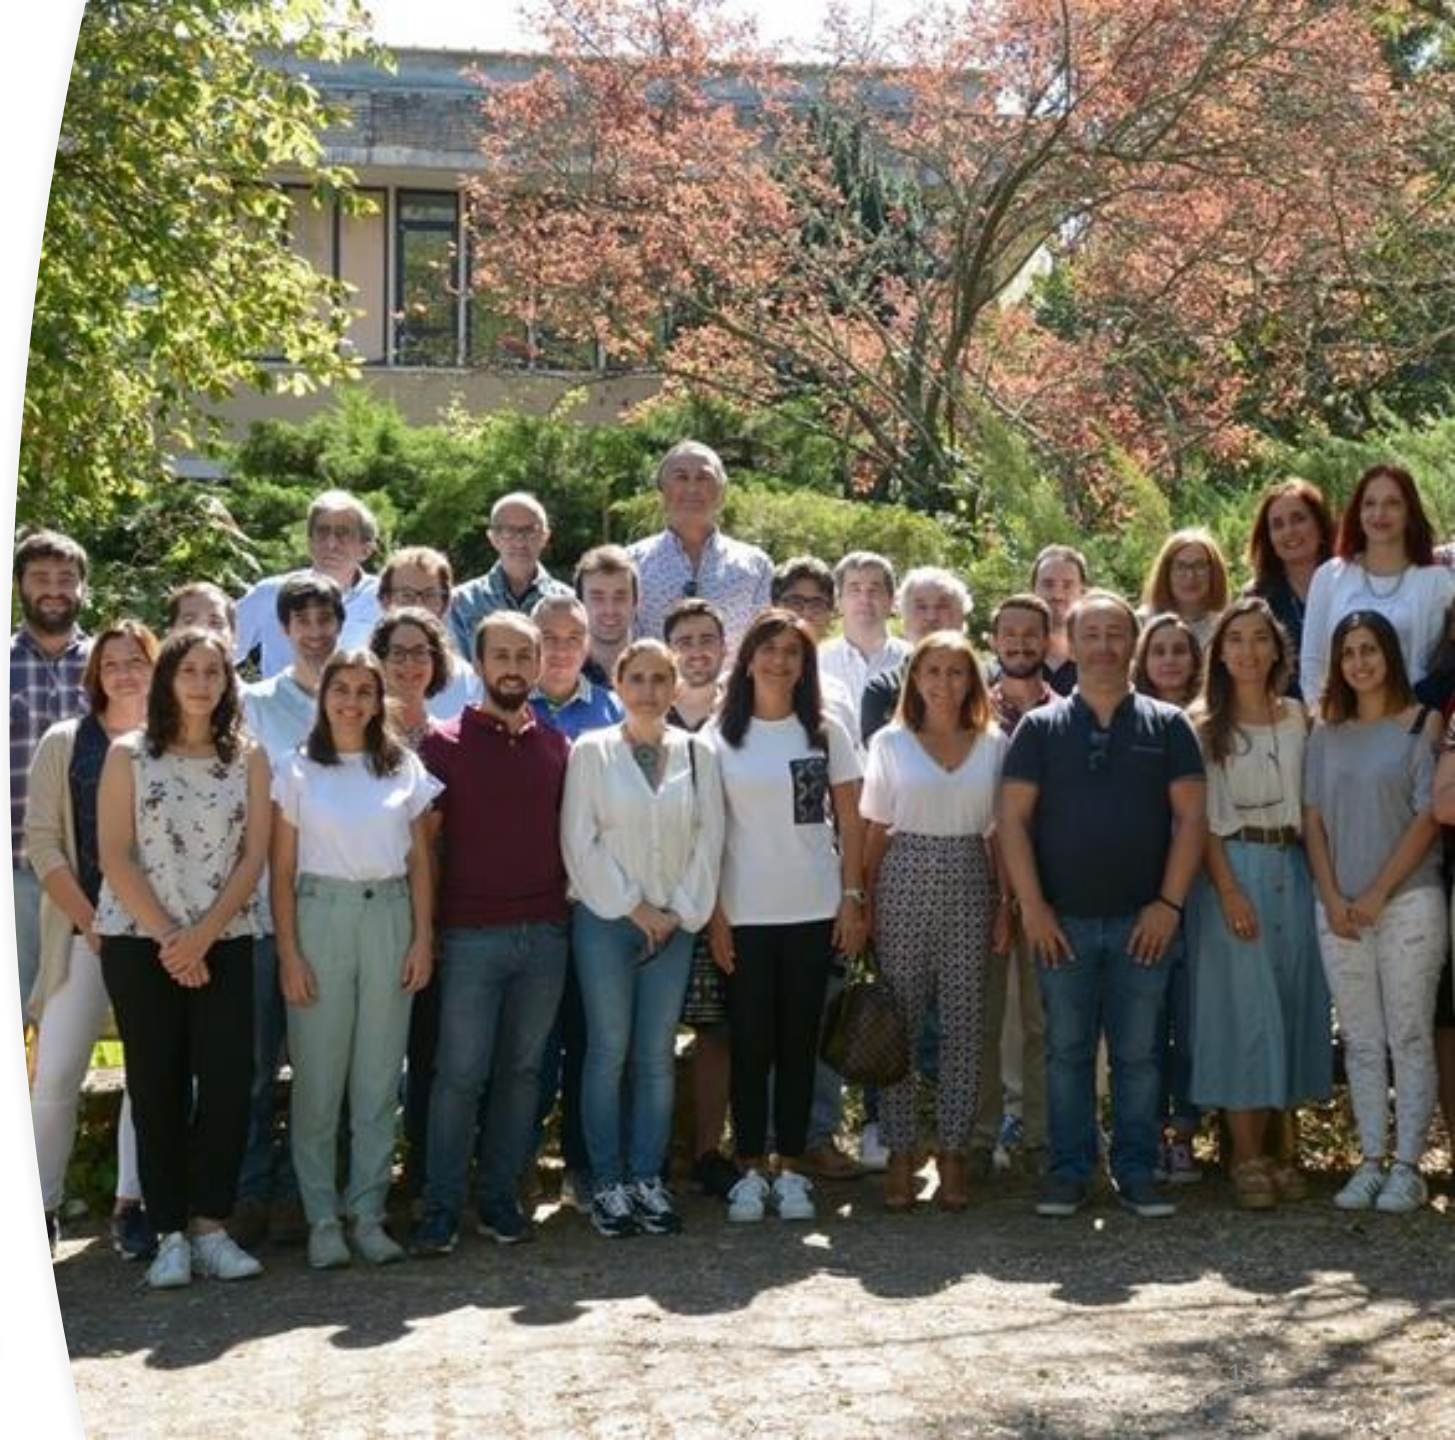

Thank you for  
your attention

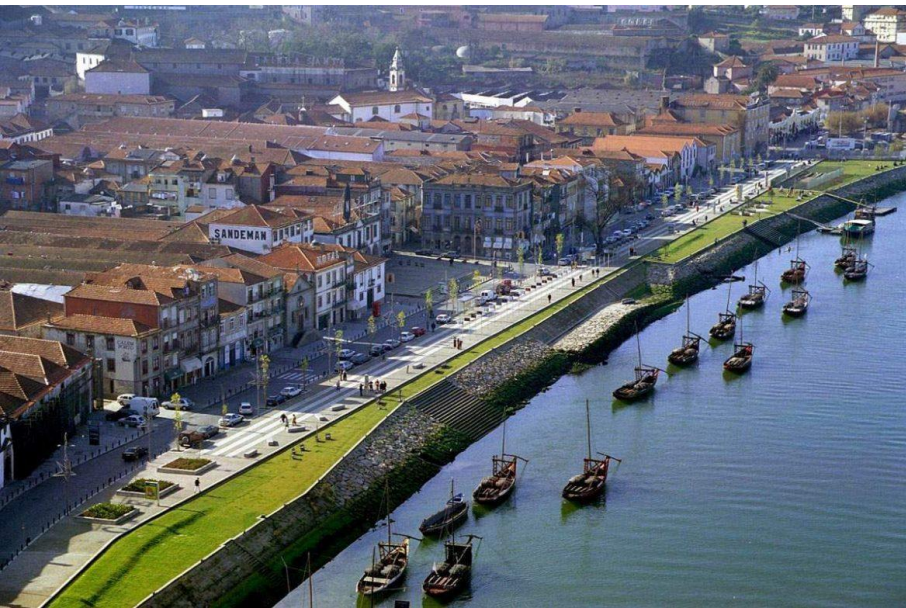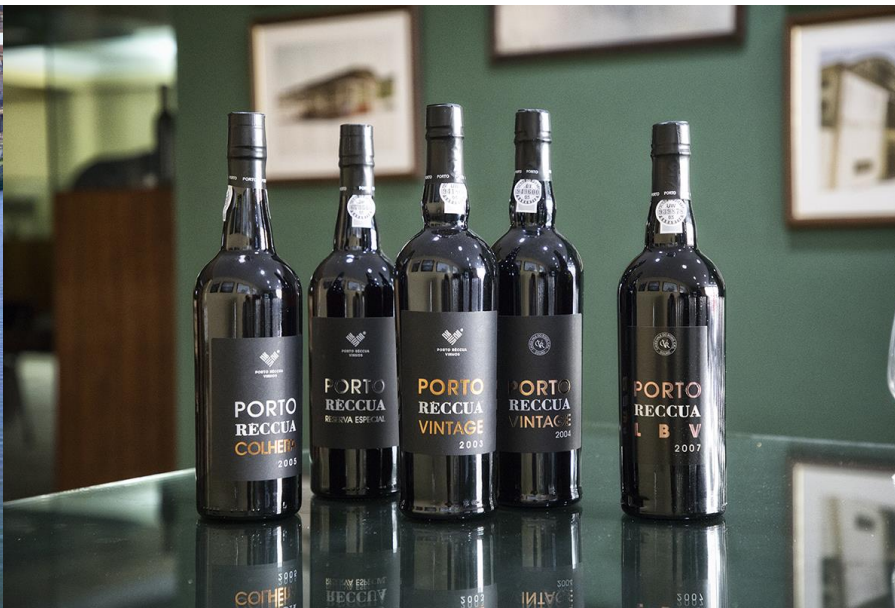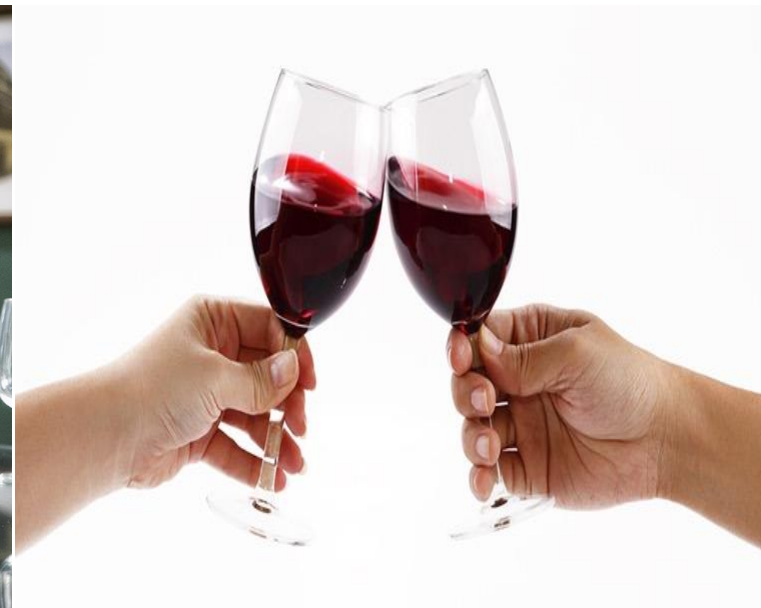

Supplement: s1 [file s1]
